# Supplementary material for: Re: Robot-assisted laparoscopic radical prostatectomy: assistant’s seniority has no influence on perioperative course
Source: Springer Nature journal article supplement (doi:10.1007/s11701-018-0836-z), 2018-06-12
Supplement: MOESM1 [file 15839402]

**Table. Selected tweets from Journal of Robotic Surgery Journal Club May 2018**

| 1. Faraz Khan @FarazKh65499316/Twitter: Ensuring arms don’t tangle up, suction, irrigation, swabs in and out, clips, haemostasis, “extra” traction, compression, pull & tug a bit, change port instruments, someone to chat to, teach, learn from, second opinions… 4:18 pm – 1 May 2018 2. Leslie Deane MBBS, MS, FRCSC, FACS @lesdeane/Twitter: An assistant whom one does not have to remind of every step is clearly best, what I refer to as the silent assistant - he/she who does it before you have to say it and assists as though they were doing the operation through your eyes and hands. 6:36 am – 2 May 2018 3. Igor Sorokin @DrIgorSorokin/Twitter: Yes for sure a lot of responsibilities for the assistant. Would you cancel or postpone a case if your trusted assistant wasn’t available? #robojc. 4:26 pm – 1 May 2018 4. Faraz Khan @FarazKh65499316/Twitter: No, as long as there is a suitable person to assist…but ideally should have a “known-paired” team, synchronization important. 4:31 pm – 1 May 2018 5. Noah Canvasser @noahcanvasser/Twitter: Certainly a regular assist is a nice luxury. I personally try to make the assists job as simple as possible so I can do the case with anyone- do not rely on them for complex moves. Often just 1 instrument through 1 port, suction/clip/pass suture. #robojc. 10:19 pm – 1 May 2018 6. Jessica Nelson @JessicaPAc09/Twitter: While these findings are, as previously stated, reassuring to the surgeon and patient, I have heard numerous times from fellows who train with us at UTSW that it is helpful to have a well trained stable PA at the bedside. #robojc. 5:59 pm – 1 May 2018 7. Igor Sorokin @DrIgorSorokin/Twitter: Of course residents like to be freed up from assisting so they can have more time at console. But gaining experience for residents at bedside is equally important as we discussed in previous journal club. Nonetheless, a great PA is invaluable #robojc. 6:40 pm – 1 May 2018 8. Diana Cardona-Grau @DrCardonaGrau/Twitter: A consistent PA is great since they become familiar w surgeon preference but for trainees, experience w assisting becomes impnt when actually on the console & need to troubleshoot issues at bedside. If not familiar with bedside assist, may have less insight into soltns. #robojc. 6:37 am – 2 May 2018 9. Noah Canvasser @noahcanvasser/Twitter: ts also surgeon dependent. JC uses the PAs to retract through parts of the case- he can do that because they are skilled. They also place the bulldogs for partials. Would be challenging for a PGY1 to step in and replicate. #robojc. 10:31 pm – 1 May 2018 10. Igor Sorokin @DrIgorSorokin/Twitter: Agree - the approach to RALPs is not universal. Some surgeons heavy on clip usage, some not. Some use robotic clip applier and some rely on assistants for clips. Surgeon may tailor the approach to NV bundles based on assistant #robojc. 3:50 am – 2 May 2018 11. Yasmin Abu-Ghanem @Yasminabugh/Twitter: I think that the main point that assistants can be safely incorporated into this procedure even when they are less experience surgeons (PGY 1-3) and become “well trained” in Robotic surgery regardless to previous practice #robojc. 4:48 am – 2 May 2018 |
| --- |
